# Supplementary material
Source: PubMed Central journal article supplement (PMC3773228)

A

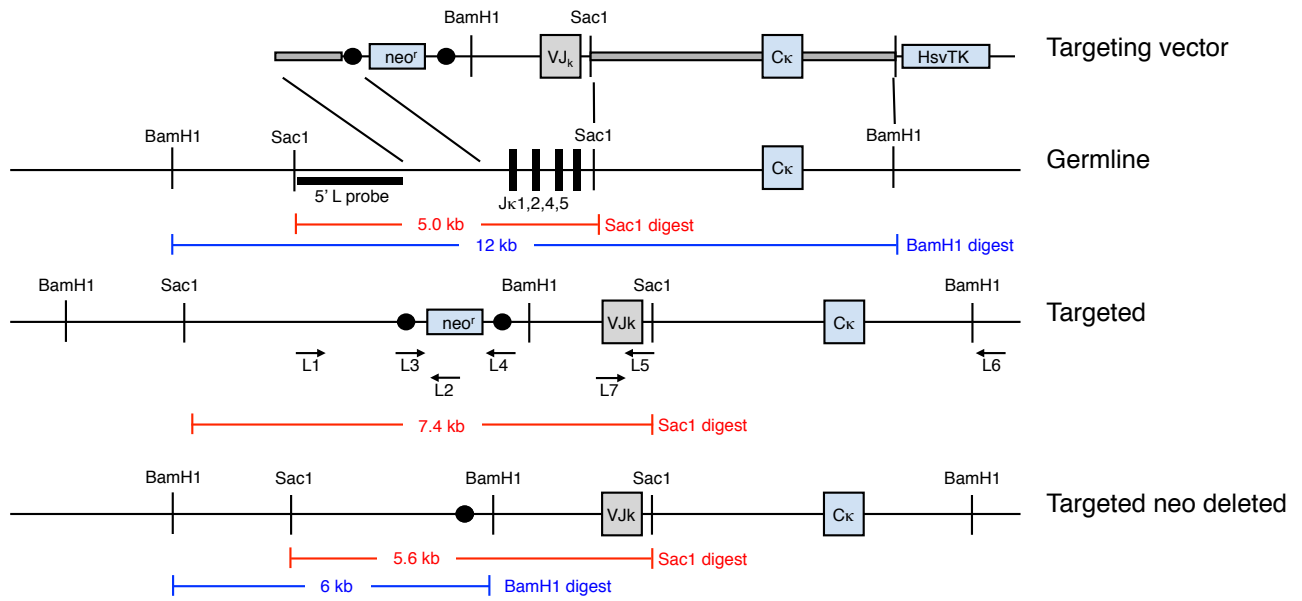

B

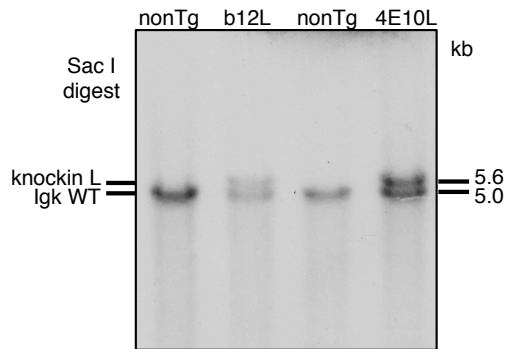

C

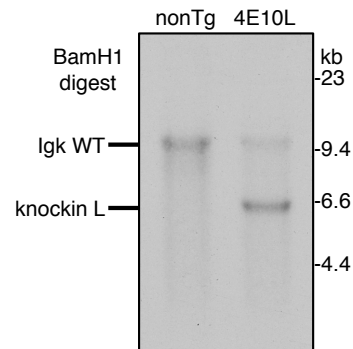

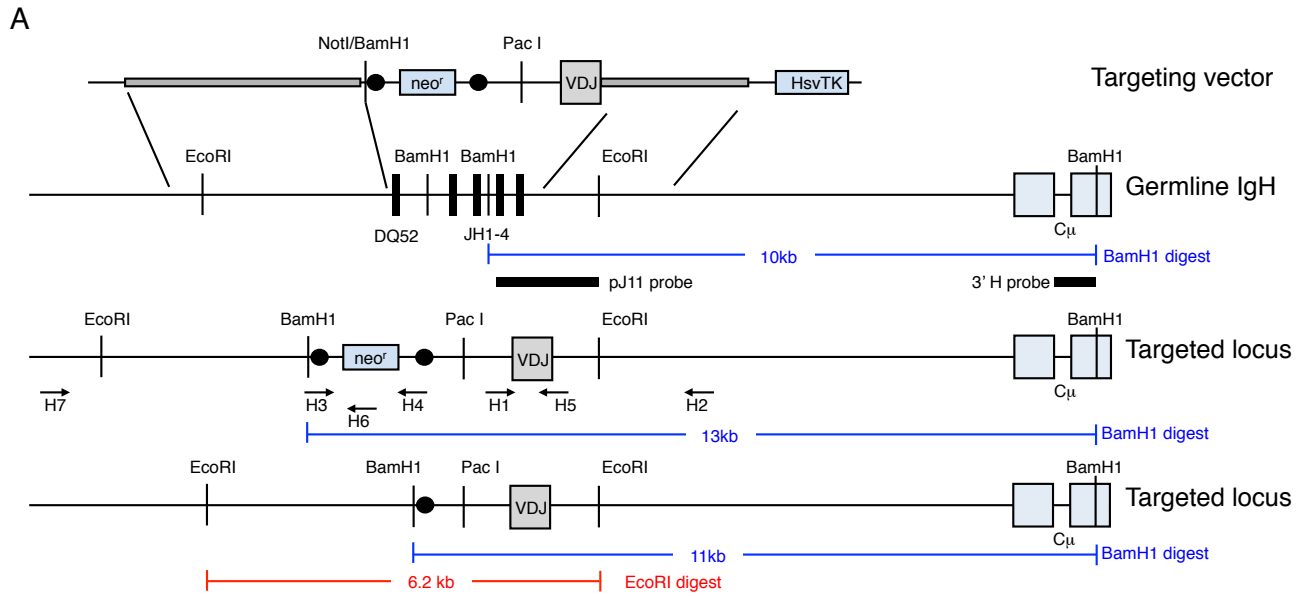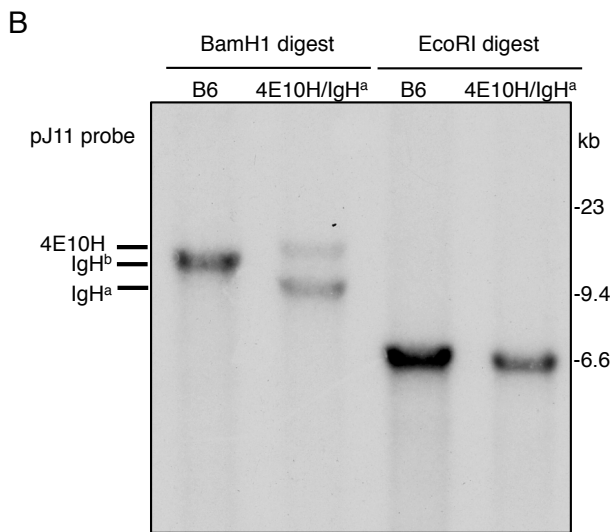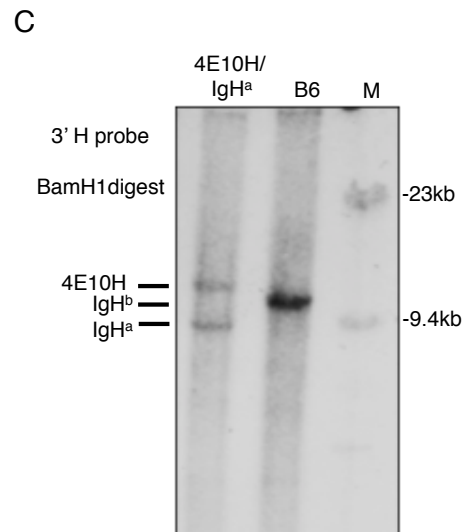

Supplement: NIHMS509557-supplement-2.pdf [file NIHMS509557-supplement-2.pdf]
